# Supplementary material for: GGA1 participates in spermatogenesis in mice under stress
Source: PeerJ journal article supplement (doi:10.7717/peerj.15673), 2023-08-03
Supplement: Supplementary_material_of_image.pdf [file Supplementary_material_of_image.pdf]

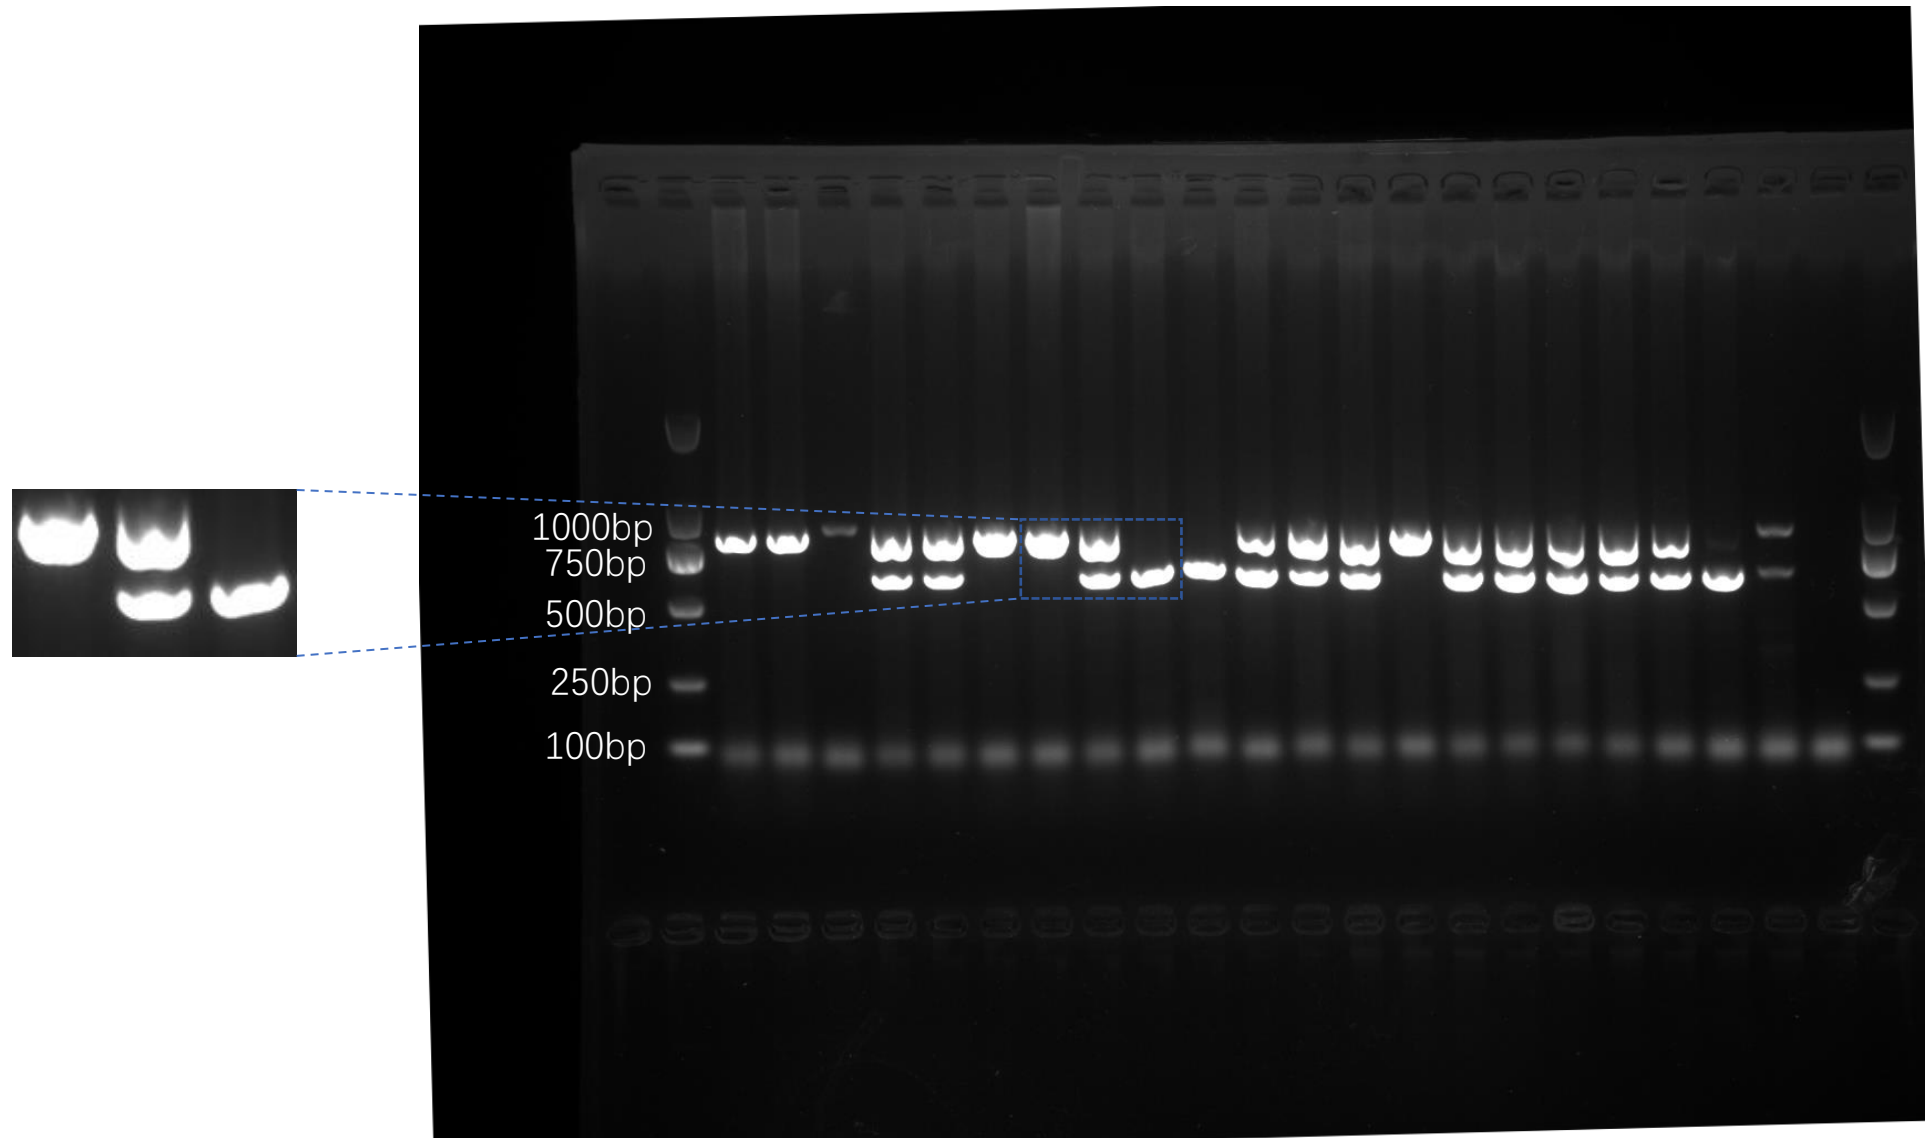

Figure1B: Genotyping of *Ggal*<sup>+/+</sup>, *Ggal*<sup>+/-</sup> and *Ggal*<sup>-/-</sup> mice.

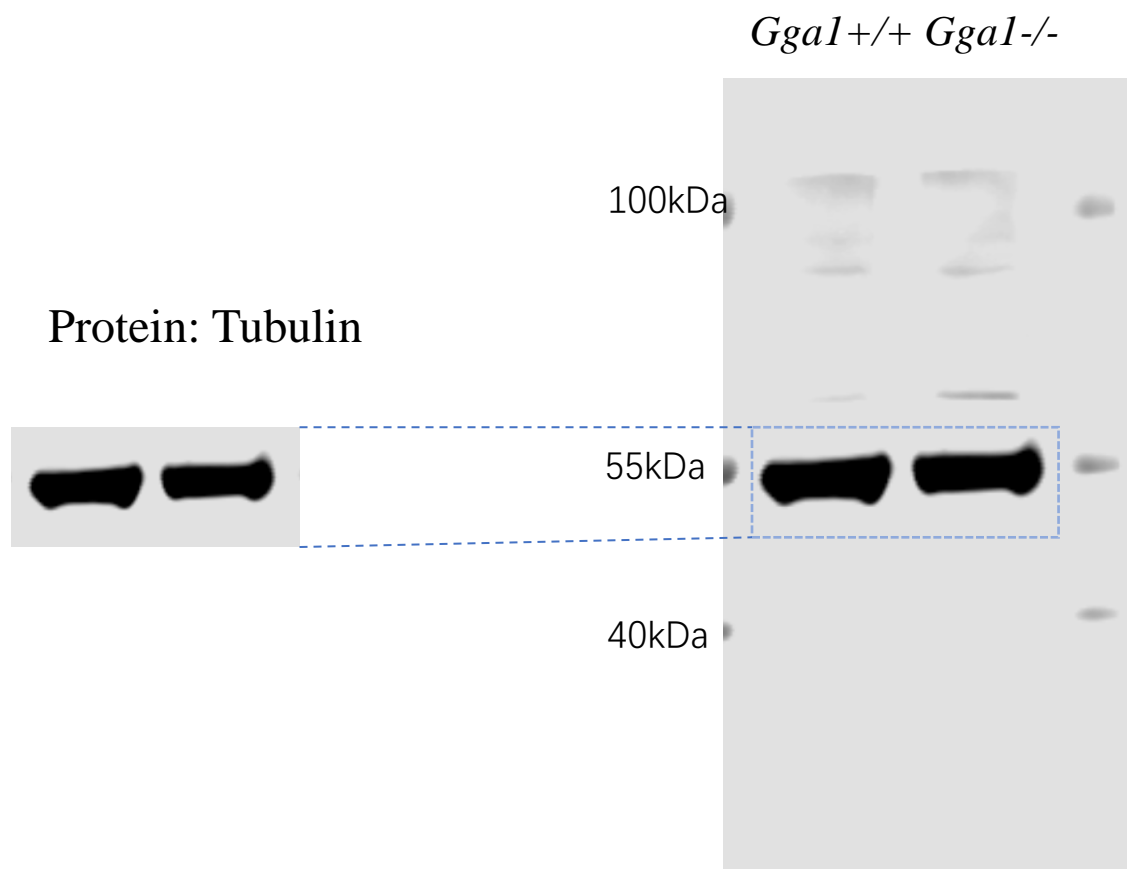

Protein: GGA1

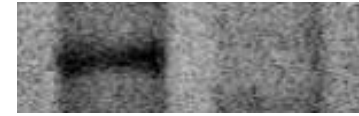

130kDa

100kDa

55kDa

40kDa

*Ggal*<sup>+/+</sup> *Ggal*<sup>-/-</sup>

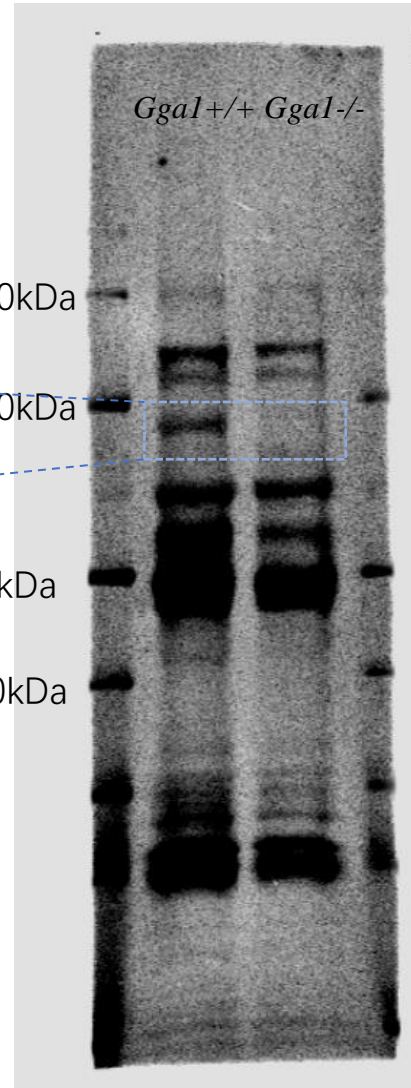

Figure1C: The GGA1 protein was completely absent in the testis of *Ggal*<sup>-/-</sup> mice. Immunoblotting of GGA1 was performed in *Ggal*<sup>+/+</sup> and *Ggal*<sup>-/-</sup> testis. TUBULIN served as a loading control..

*Ggal*<sup>+/+</sup>

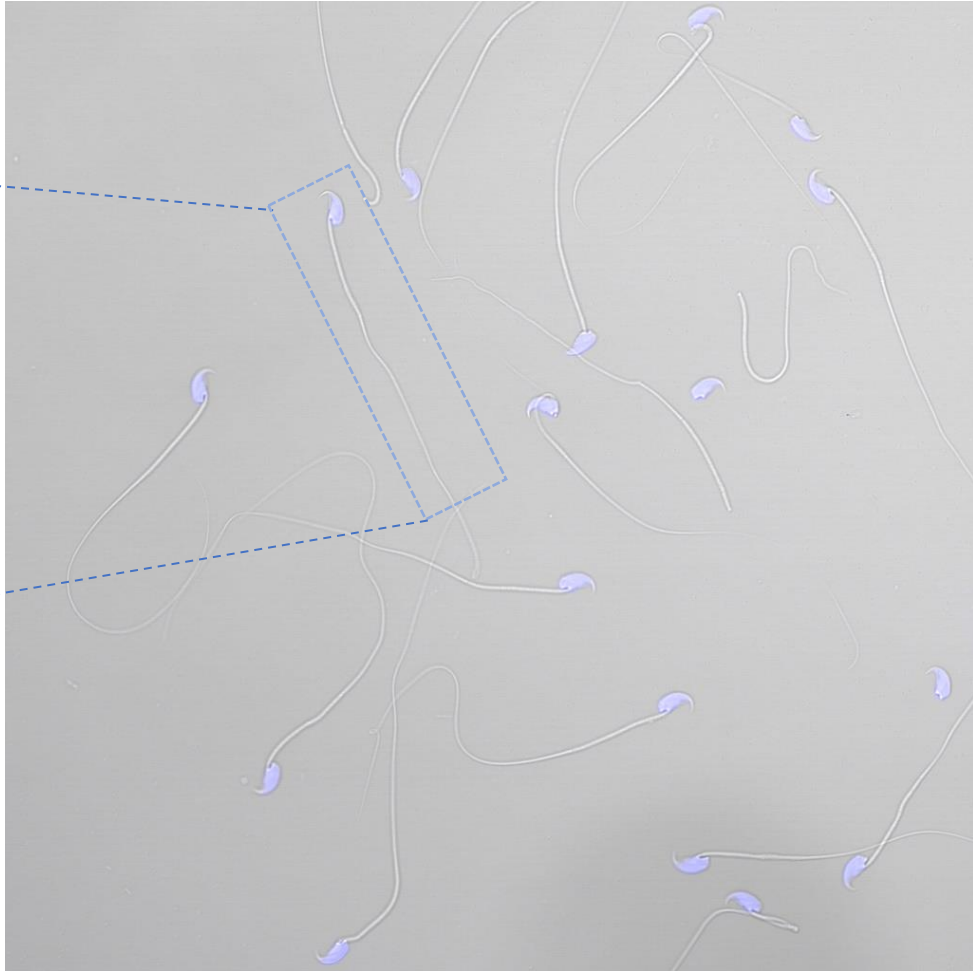

*Ggal*<sup>-/-</sup>

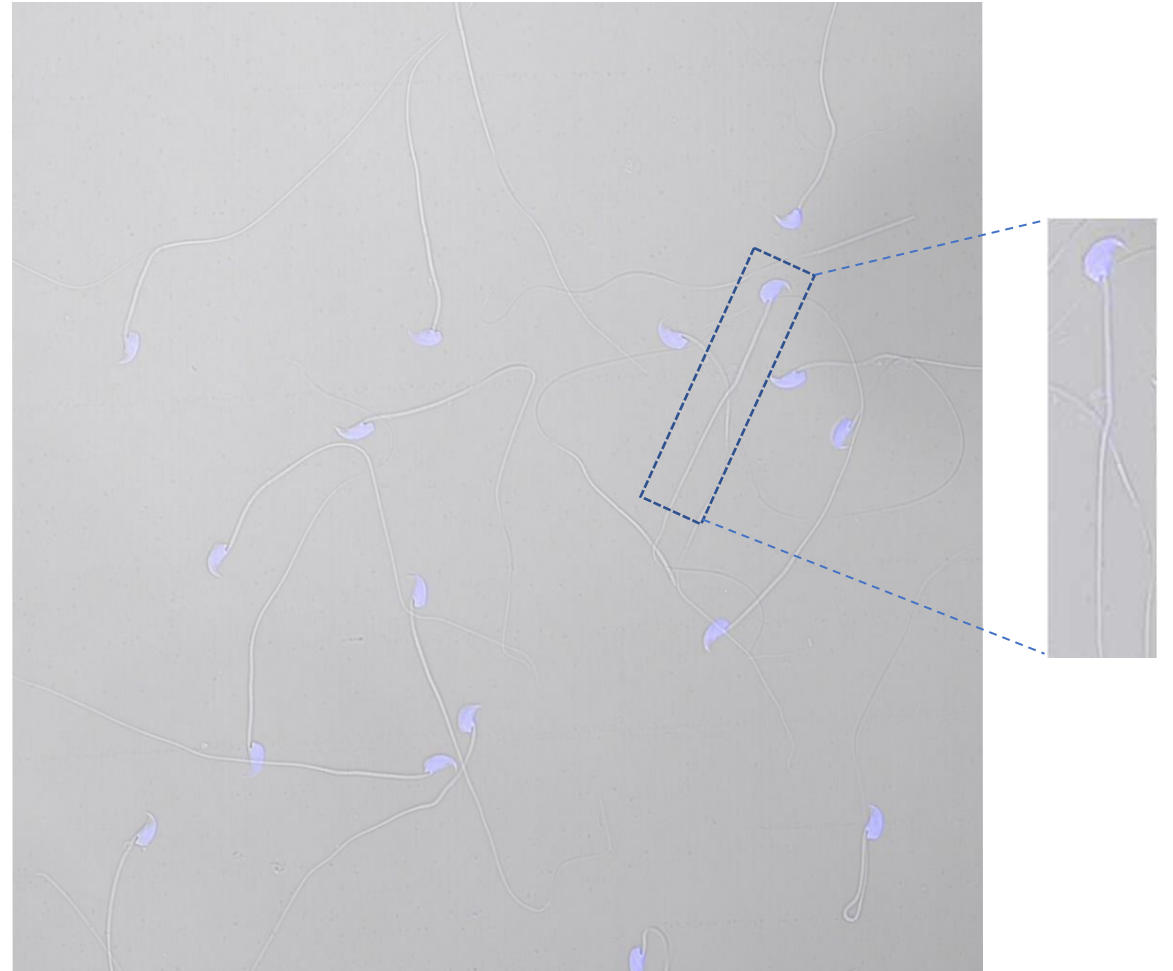

Figure1J: Immunofluorescence staining of DAPI in *Ggal*<sup>+/+</sup> and *Ggal*<sup>-/-</sup> spermatozoa.

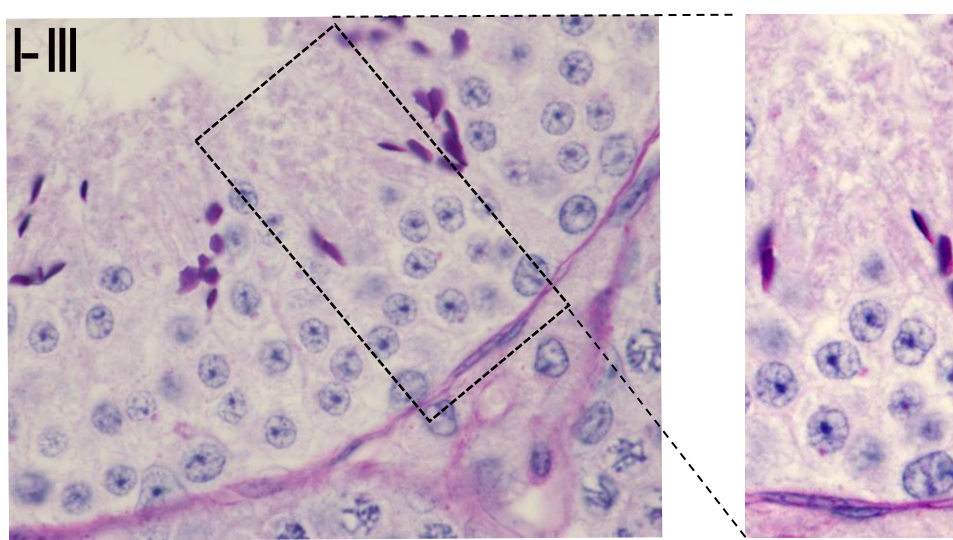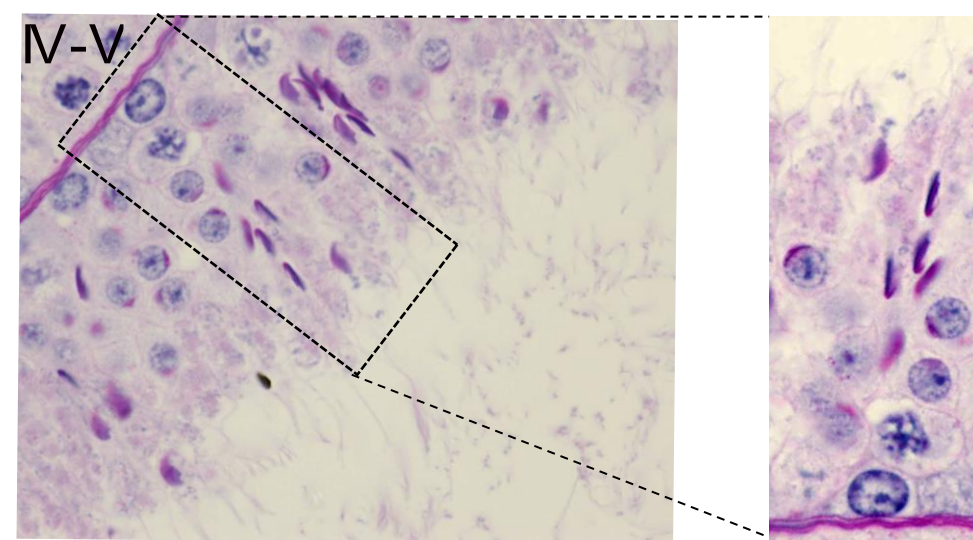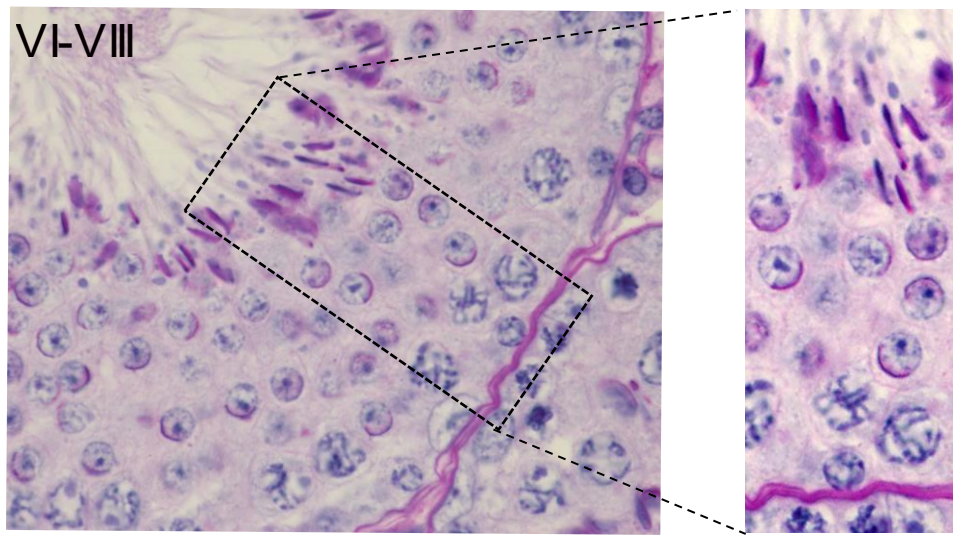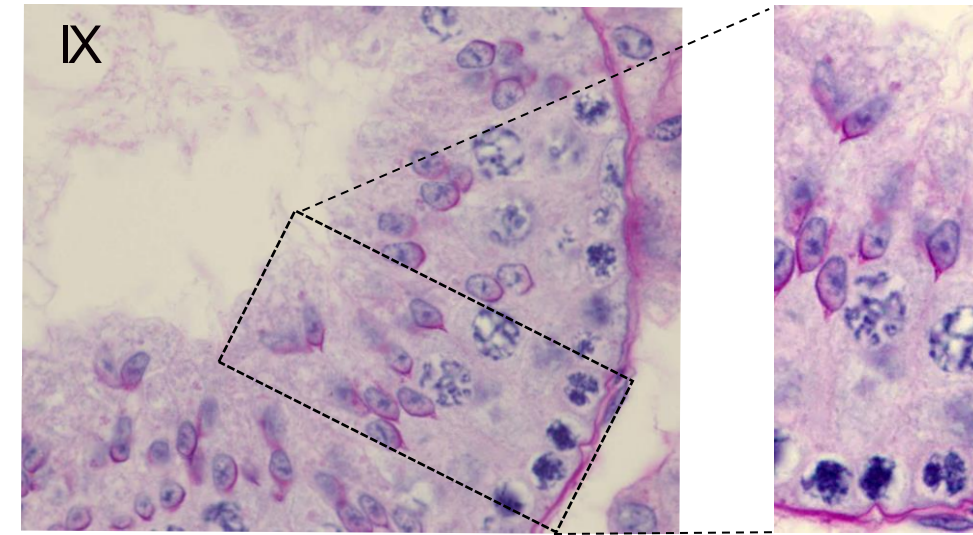

Figure4B: Paraffin sections of seminiferous tubules from BPA-treated *Ggal*<sup>+/+</sup> males were stained with PAS-hematoxylin.

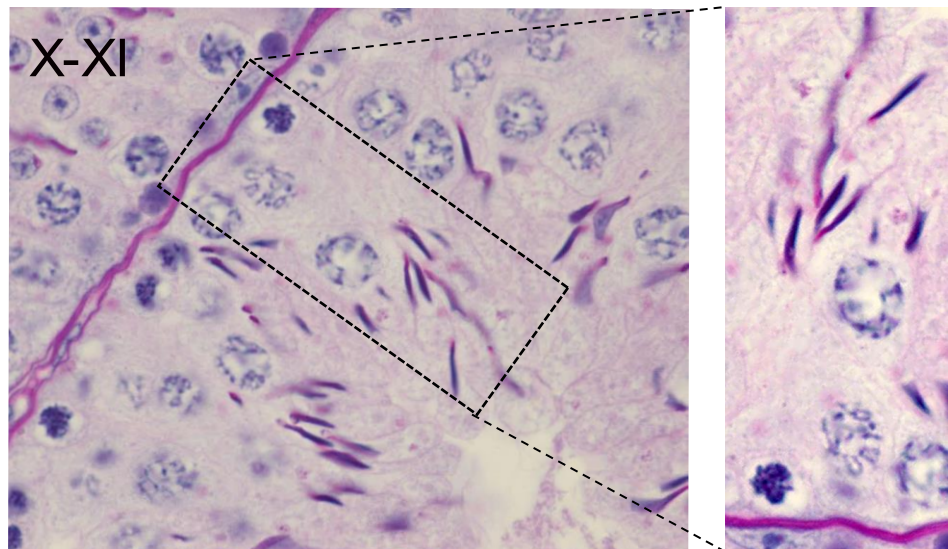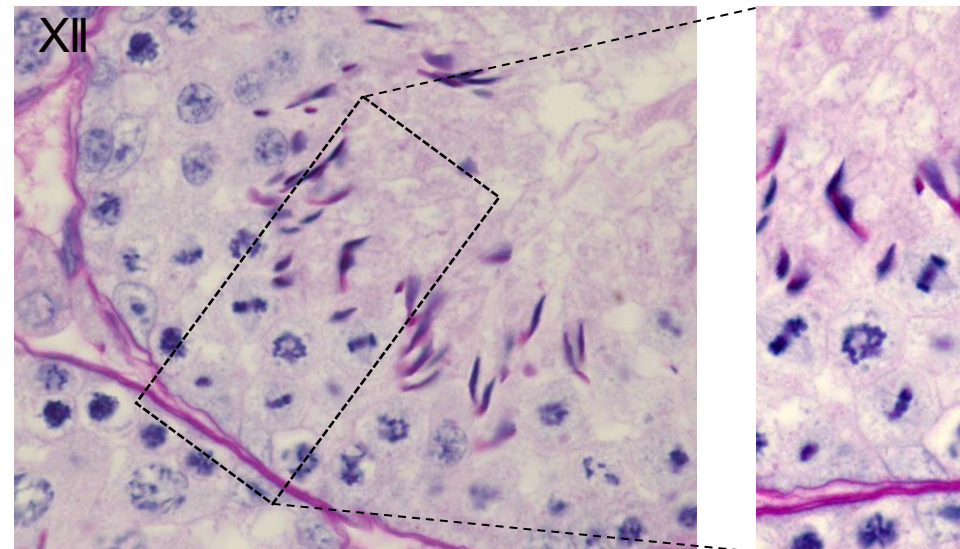

Figure4B: Paraffin sections of seminiferous tubules from BPA-treated *Ggal*<sup>+/+</sup> males were stained with PAS-hematoxylin.

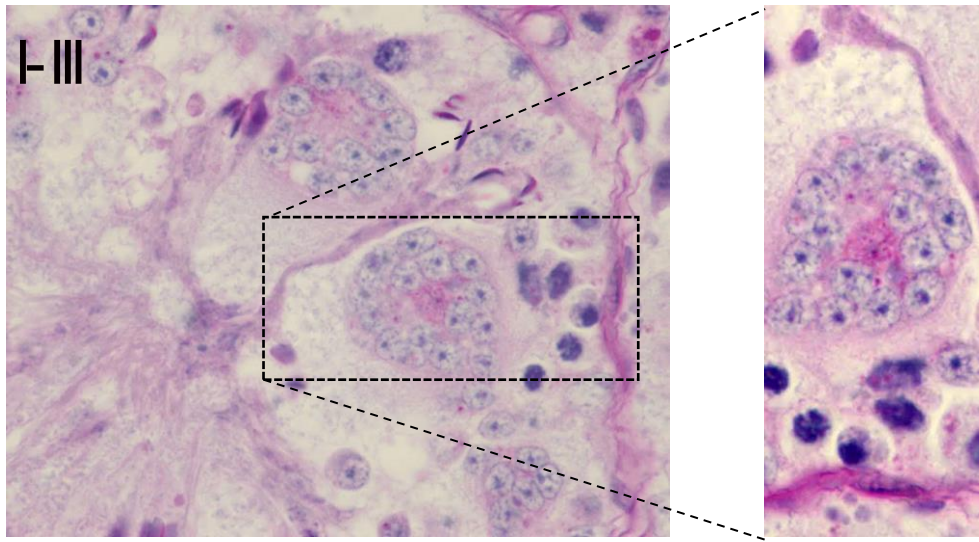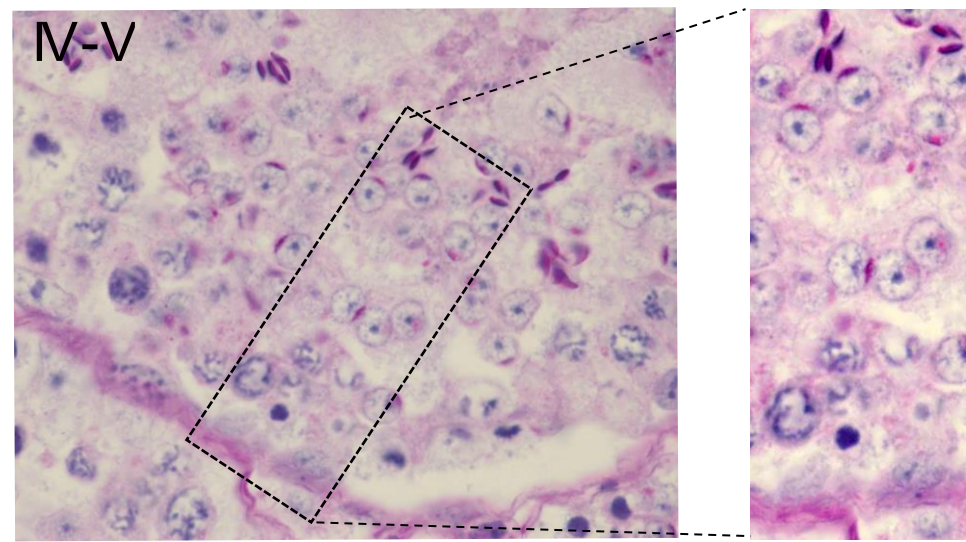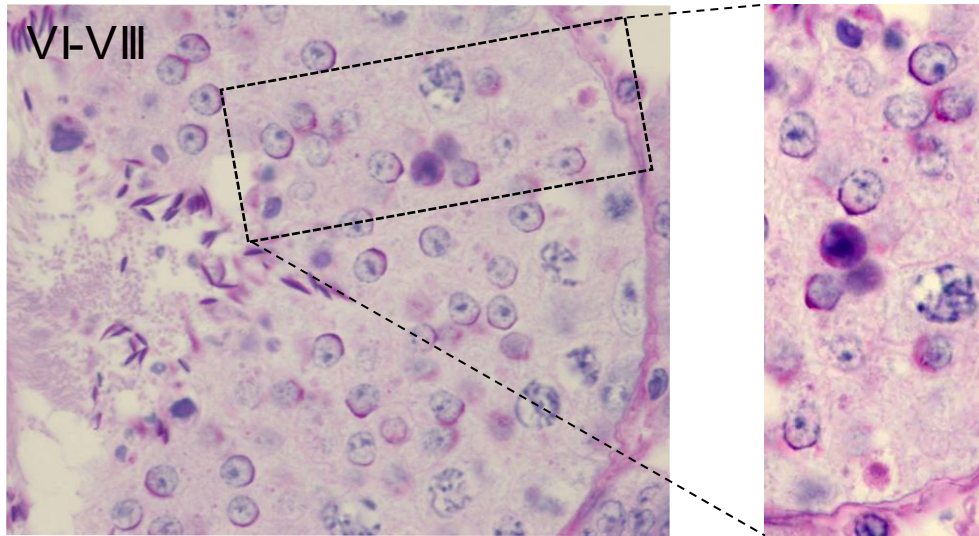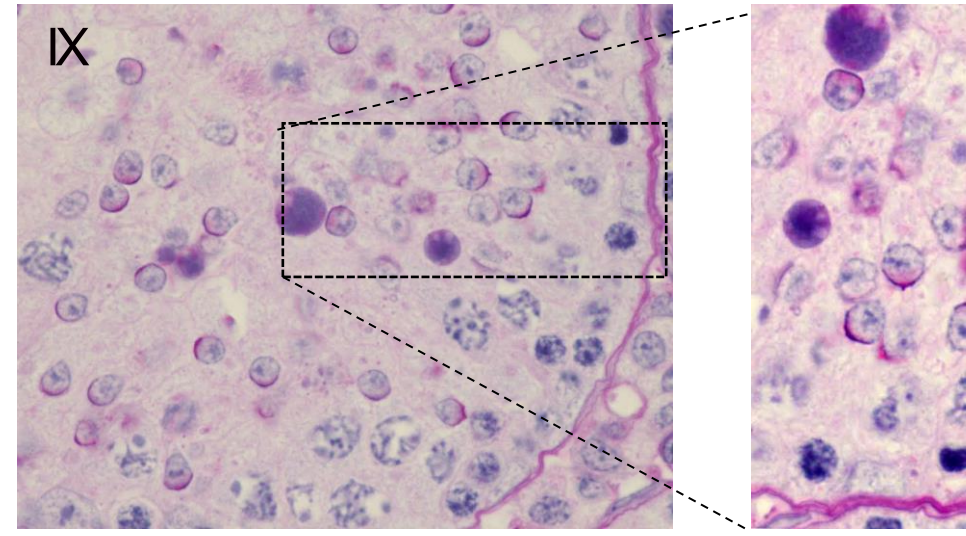

Figure4B: Paraffin sections of seminiferous tubules from BPA-treated *Ggal*<sup>-/-</sup> males were stained with PAS-hematoxylin.

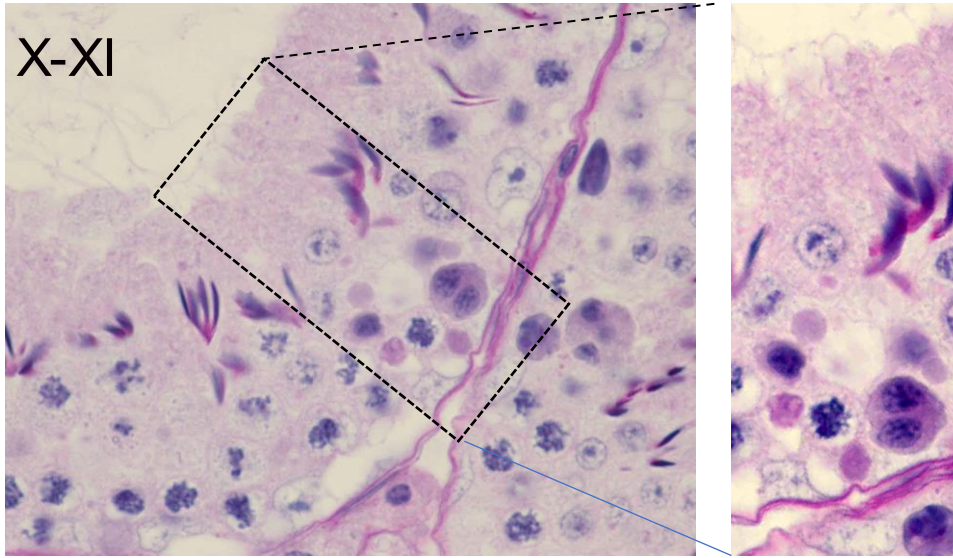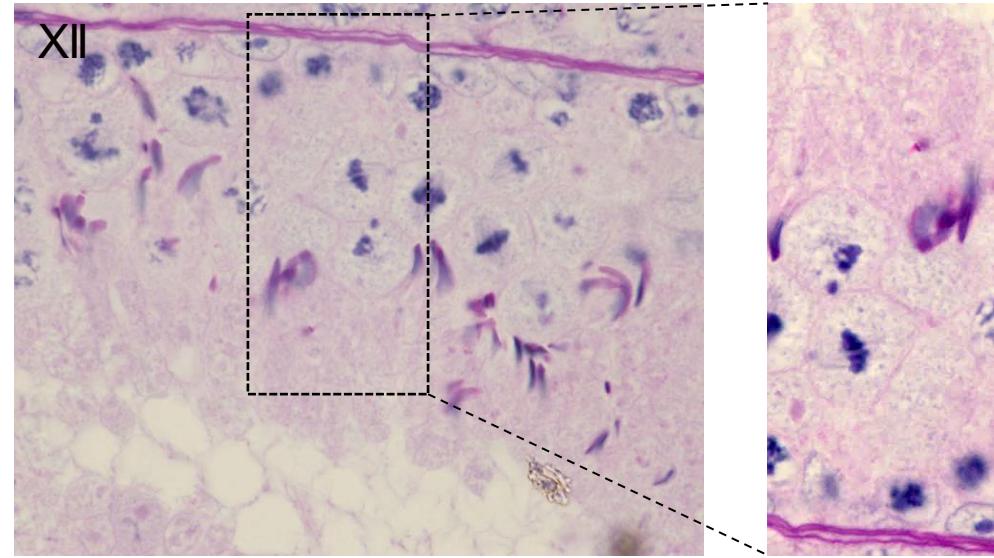

Figure4B: Paraffin sections of seminiferous tubules from BPA-treated *Ggal*<sup>-/-</sup> males were stained with PAS-hematoxylin.
